# Supplementary material for: When couples fight about money, what do they fight about?
Source: PubMed Central journal article supplement — J Soc Pers Relat. 2023 Jul 5;40(11):3723–51. doi: 10.1177/02654075231187897 (PMC10632137; doi:10.1177/02654075231187897), 2023-07-05

## Supplemental Analyses for “When couples fight about money, what do they fight about?”

**Table OS1**

Frequency of recalled financial disagreements (Study 2) coded according to 8 themes and 41 codes identified in social media sample.

| Theme                                 |    | Codes                                                                              |
|---------------------------------------|----|------------------------------------------------------------------------------------|
| Perceived Irresponsibility (36.8%)    | 1  | Lack of planning for the future by one partner (1.5%)                              |
|                                       | 2  | Downward trajectory (0%)                                                           |
|                                       | 3  | Budgeting disagreements on how or whether to budget (13.4%)                        |
|                                       | 4  | Personal purchases that are seen as unnecessary by one partner (13.8%)             |
|                                       | 5  | Impulse purchases that were unplanned and seen as irresponsible (2.5%)             |
|                                       | 6  | Not saving as intended or not enough (1.0%)                                        |
|                                       | 7  | Debt acquired before or during the relationship (4.2%)                             |
|                                       | 8  | Broken Promise about a financial obligation (0.2%)                                 |
|                                       | 9  | Gambling and money spent on drugs or alcohol (0.2%)                                |
| One-sided Decisions (1.7%)            | 10 | Left out of the loop about financial decisions (1.3%)                              |
|                                       | 11 | Hiding or lying about expenses or income (0.4%)                                    |
|                                       | 12 | Sex work (0%)                                                                      |
| Different financial values (15.9%)    | 13 | Unequal financial background (e.g., socioeconomic differences) (0%)                |
|                                       | 14 | Different priorities in spending (13.0%)                                           |
|                                       | 15 | Different savings attitudes regarding how much or how saving should occur (2.9%)   |
| Job or Income issues (5.2%)           | 16 | Income loss or not enough income by one partner (2.1%)                             |
|                                       | 17 | Unequal income between partners creating tension (0.4%)                            |
|                                       | 18 | Strain, unexpected expense, subsistence struggle (1.3%)                            |
|                                       | 19 | Embarrassment about partner’s job because of its low earning potential (0.2%)      |
|                                       | 20 | Impending or desired career changes (0.8%)                                         |
|                                       | 21 | One partner failing to get a job, seen as not trying hard enough (0%)              |
|                                       | 22 | One partner rejecting work or a job completely (0.4%)                              |
|                                       | 23 | One partner discourages other partner from taking a job or extra work (0%)         |
| Financial Decisions (29.1%)           | 24 | Car purchase or lease (7.5%)                                                       |
|                                       | 25 | House purchase or committing to rental contract (3.6%)                             |
|                                       | 26 | Other one-time joint expense (wedding, vacation, moving in) (16.7%)                |
|                                       | 27 | How to deal with a windfall of money (e.g., invest it, save it, spend it) (1.3%)   |
| Terms of financial arrangement (4.0%) | 28 | Dissatisfaction with the exchange-oriented nature of financial arrangements (0.2%) |
|                                       | 29 | Lending/Borrowing terms between partners (0%)                                      |
|                                       | 30 | Prenup/Postnup (0%)                                                                |
|                                       | 31 | Whether finances should be combined or kept separate (0.2%)                        |
|                                       | 32 | Accepting help or giving help to family (3.6%)                                     |
|                                       | 33 | Harmful withholding of funds (0%)                                                  |
| Who pays? (5.4%)                      | 34 | Rent/mortgage contributions (e.g., equal or proportional to income?) (0.6%)        |
|                                       | 35 | Who should pay for relationship-enhancing activities such as dates (0.2%)          |
|                                       | 36 | Ongoing joint expenses (bills, food, pets, children) (4.6%)                        |
| Unfair Contributions (1.9%)           | 37 | Lack of reciprocity in household contributions between the partners (0.2%)         |
|                                       | 38 | Lack of unsolicited financial help (0.2%)                                          |
|                                       | 39 | Imbalance in chores and financial contributions to the household (0%)              |
|                                       | 40 | Receiving too few or cheap gifts (0.4%)                                            |
|                                       | 41 | Receiving too many or overly expensive gifts                                       |

*Note.* Two naïve raters coded the data to only one of the codes, a third coder resolved disagreements.

**Table OS2**

Logistic regression coefficients for regression of themes on relationship length, couple income, and joint finances (0 = partly or fully separate; 1 = fully joint)

|                            |                            | <i>B</i>     | <i>SE</i>   | <i>p</i>        | <i>Exp(B)</i> |
|----------------------------|----------------------------|--------------|-------------|-----------------|---------------|
| Relative Contributions     | Relationship Length        | .000         | .001        | .702            | 1.000         |
|                            | <b>Couple Income</b>       | <b>-.117</b> | <b>.035</b> | <b>&lt;.001</b> | <b>.889</b>   |
|                            | Separate vs. Joint         | -.227        | .284        | .424            | .797          |
| Job and Income             | Relationship Length        | -.002        | .001        | .128            | .998          |
|                            | <b>Couple Income</b>       | <b>-.153</b> | <b>.047</b> | <b>.001</b>     | <b>.858</b>   |
|                            | Separate vs. Joint         | -.290        | .356        | .416            | .748          |
| Different Values           | <b>Relationship Length</b> | <b>.002</b>  | <b>.001</b> | <b>.011</b>     | <b>1.002</b>  |
|                            | Couple Income              | -.031        | .026        | .239            | .970          |
|                            | Separate vs. Joint         | -.006        | .238        | .980            | .994          |
| Exceptional Expenses       | Relationship Length        | .000         | .001        | .625            | 1.000         |
|                            | Couple Income              | .040         | .023        | .085            | 1.041         |
|                            | Separate vs. Joint         | .213         | .222        | .337            | 1.237         |
| Mundane Expenses           | Relationship Length        | .001         | .001        | .253            | 1.001         |
|                            | Couple Income              | .041         | .025        | .096            | 1.042         |
|                            | Separate vs. Joint         | .025         | .234        | .914            | 1.026         |
| Money Management           | Relationship Length        | -.001        | .001        | .365            | .999          |
|                            | Couple Income              | -.026        | .030        | .380            | .974          |
|                            | Separate vs. Joint         | .341         | .278        | .220            | 1.406         |
| Perceived Irresponsibility | Relationship Length        | -.001        | .001        | .268            | .999          |
|                            | Couple Income              | .003         | .022        | .880            | 1.003         |
|                            | Separate vs. Joint         | .116         | .205        | .573            | 1.123         |

## Additional Information about Demographics (Study 2)

### *Frequency Distribution for Age in Years*

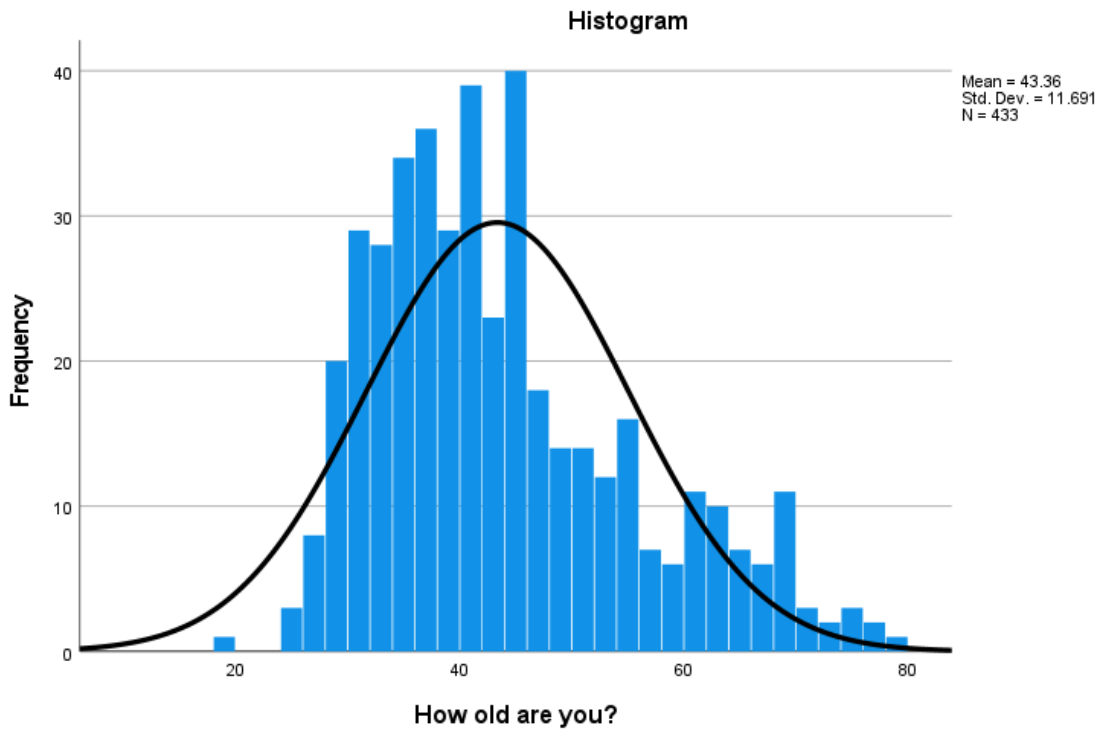

### *Frequency Distribution for Relationship Length in Years*

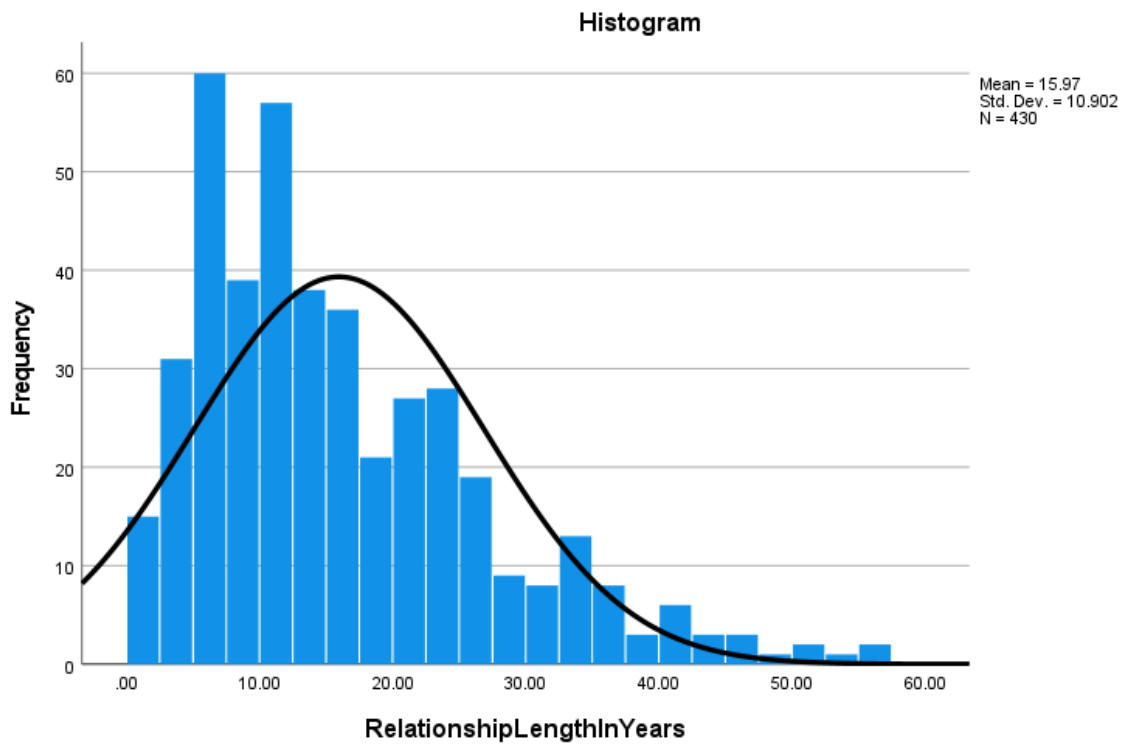

Supplement: sj-pdf-1-spr-10.1177_02654075231187897.pdf [file sj-pdf-1-spr-10.1177_02654075231187897.pdf]
